# Supplementary material for: Polyphenolic profiles and the in vivo antioxidant effect of nipa vinegar on paracetamol induced liver damage
Source: Royal Society of Chemistry journal article supplement (doi:10.1039/c6ra13409b), 2016-01-01
Supplement: c6ra13409b1.pdf [file c6ra13409b1.pdf]

1 Supplementary Table 1. Primer sequence

| <b>Target Genes</b>                                                                                 | <b>Forward</b>              | <b>Reverse</b>                 |
|-----------------------------------------------------------------------------------------------------|-----------------------------|--------------------------------|
| <i>Beta actin (<math>\beta</math>-actin)</i>                                                        | 5'-TTCCAGCCTTCCTTCTTG-3'    | 3'-GGAGCCAGAGCAGTAATC-5'       |
| <i>Hypoxanthine phosphoribosyltransferase (HPRT)</i>                                                | 5'-CGTGATTAGCGATGATGAAC-3'  | 3'-AATGTAATCCAGCAGGTCAG-5'     |
| <i>Glyceraldehyde 3-phosphate dehydrogenase (GAPDH)</i>                                             | 5'-GAAGGTGGTGAAGCAGGCATC-3' | 3'- GAAGGTGGAAGAGTGGGAGTT -5'. |
| <i>Nuclear factor kappa-light-chain-enhancer of activated<br/>B cells (NF-<math>\kappa</math>B)</i> | 5'-CATTCTGACCTTGCCTATCT-3'  | 3'-CTGCTGTTCTGTCCATTCT-5'      |
| <i>Inducible nitric oxide synthase (iNOS)</i>                                                       | 5'-GCACCGAGATTGGAGTTC-3'    | 3'-GAGCACAGCCACATTGAT-5'       |

2

3
